# Supplementary material
Source: publisher figshare collection journal article supplement (https://frontiersin.figshare.com/ndownloader/files/13393319)
Supplement: Supplementary file [file 13393319]

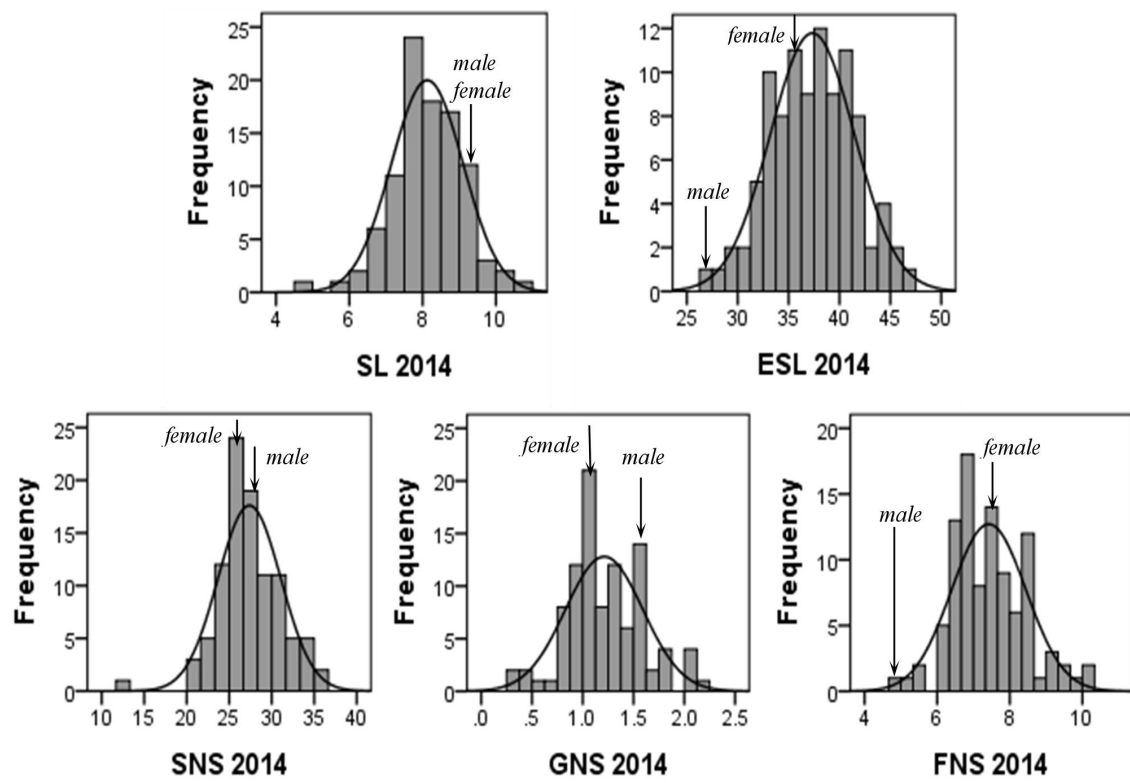

**FIGURE A** Phenotypic analysis of five traits in Langfang in 2014.

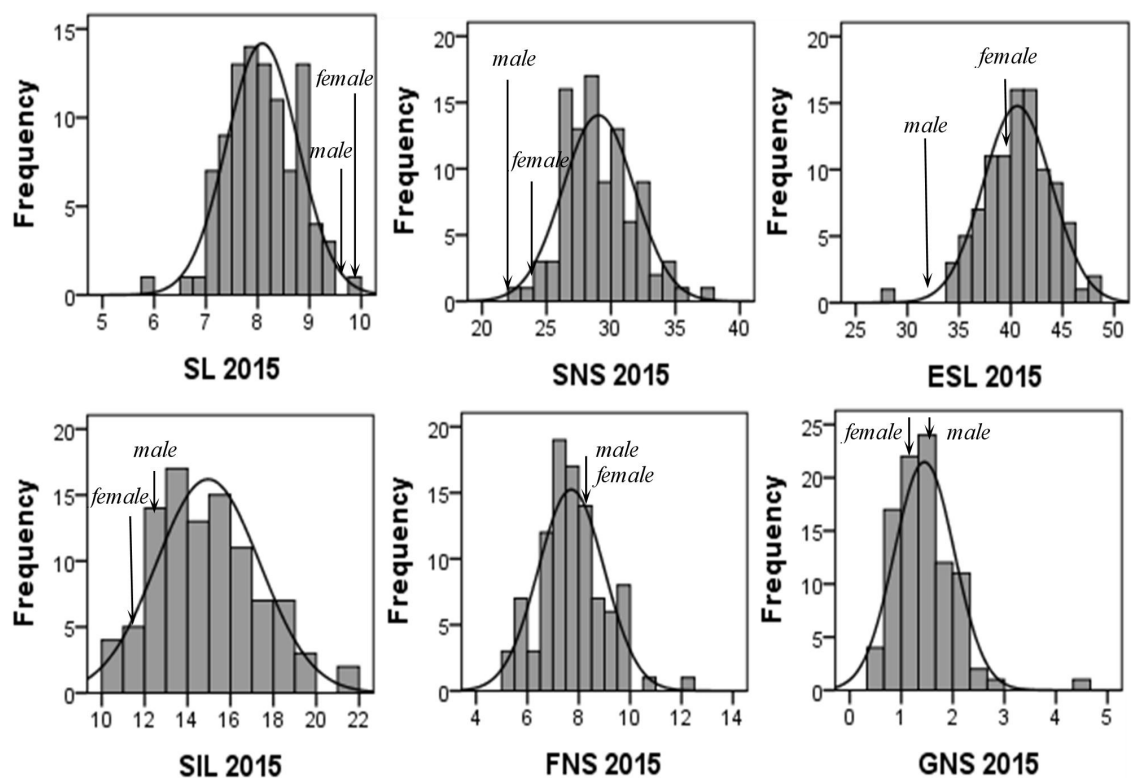

**FIGURE B** Phenotypic analysis of six traits of 3 environments in 2015.

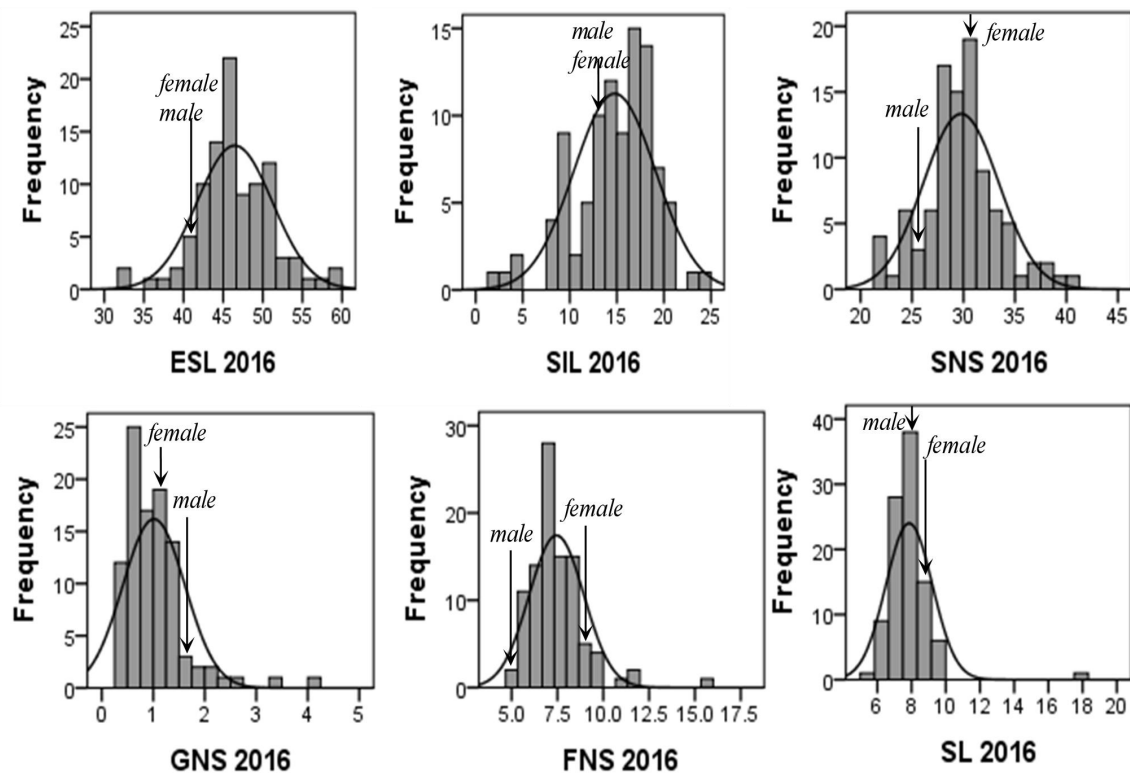

**FIGURE C** Phenotypic analysis of six traits of 3 environments in 2016.
